# Supplementary material for: Strain-induced recognition of molecular and chirality in cholesteric liquid crystal droplets for distance and curvature sensing
Source: Royal Society of Chemistry journal article supplement (doi:10.1039/d3lc00223c), 2023-01-01
Supplement: d3lc00223c1.pdf [file d3lc00223c1.pdf]

Electronic Supplementary Information for

**Strain Induced Recognition of Molecular and Chirality in Cholesteric  
Liquid Crystal Droplets for Distance and Curvature Sensing**

Shuting Xie<sup>a,b,c</sup>, Ruizhi Yang<sup>a</sup>, Qifan Zhu<sup>a</sup>, Shitao Shen<sup>a</sup>, Lanhui Li<sup>a</sup>, Minmin Zhang<sup>a,d</sup>,  
Xiaowen Hu<sup>a</sup>, Mingliang Jin<sup>a,b</sup>, Liqiu Wang<sup>c\*</sup> and Lingling Shui<sup>a,b,d\*</sup>

<sup>a</sup> International Joint Laboratory of Optofluidic Technology and System, South China Academy of Advanced Optoelectronic & School of Information and Optoelectronic Science and Engineering, South China Normal University, Guangzhou 510006, China

<sup>b</sup> International Academy of Optoelectronics at Zhaoqing, South China Normal University, Zhaoqing 526238, China

<sup>c</sup> Department of Mechanical Engineering, Hong Kong Polytechnic University, Hong Kong, China.

<sup>d</sup> Guangdong Provincial Key Laboratory of Nanophotonic Functional Materials and Devices, School of Information and Optoelectronic Science and Engineering, South China Normal University, Guangzhou 510006, China

† Author to whom correspondence should be addressed: [liqiu.wang@polyu.edu.hk](mailto:liqiu.wang@polyu.edu.hk);  
[shuill@m.scnu.edu.cn](mailto:shuill@m.scnu.edu.cn)

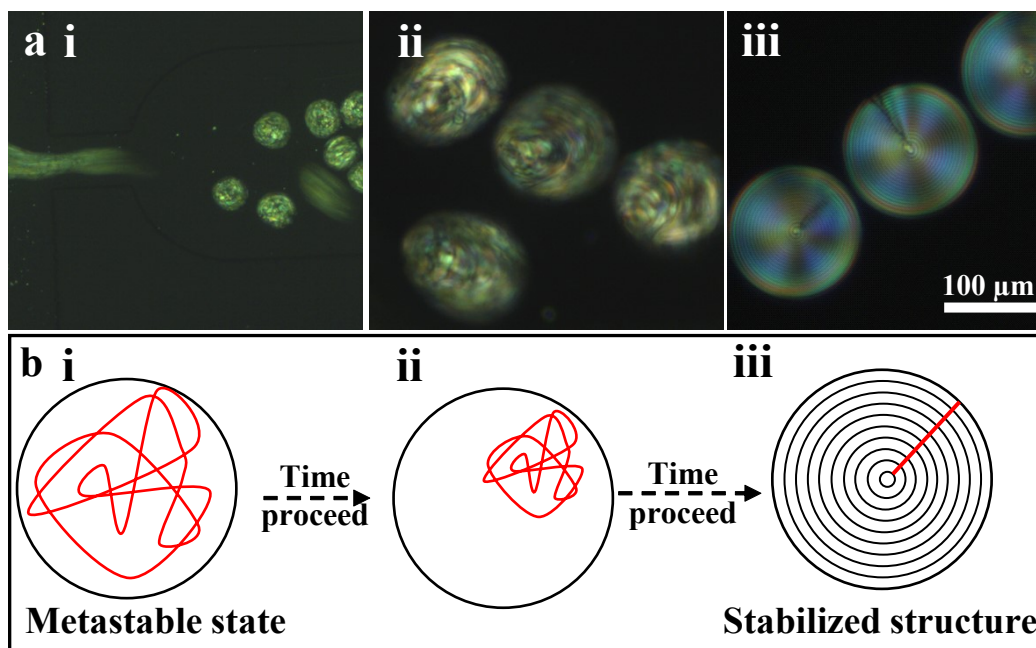

**Figure S1** Time sequence of the stabilizing configuration process of onion-like Ch-LC droplets. (a) POM images at initial metastable state (i), intermediate state (ii), and stabilized structure (iii); (b) corresponding schematic illustration of molecular state at different stages. The red curved lines in (b) represent the disclination lines.

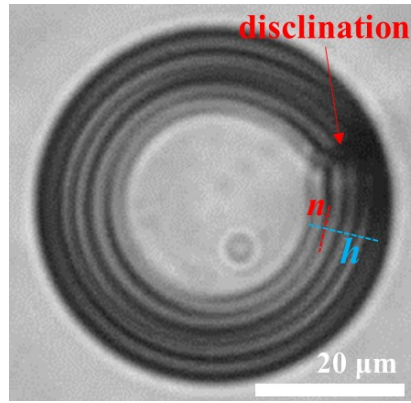

**Figure S2** An transmitted OM image of the Ch-LC droplet showing  $\mathbf{n}$  and  $\mathbf{h}$  maintained perpendicular to each other in the shell.

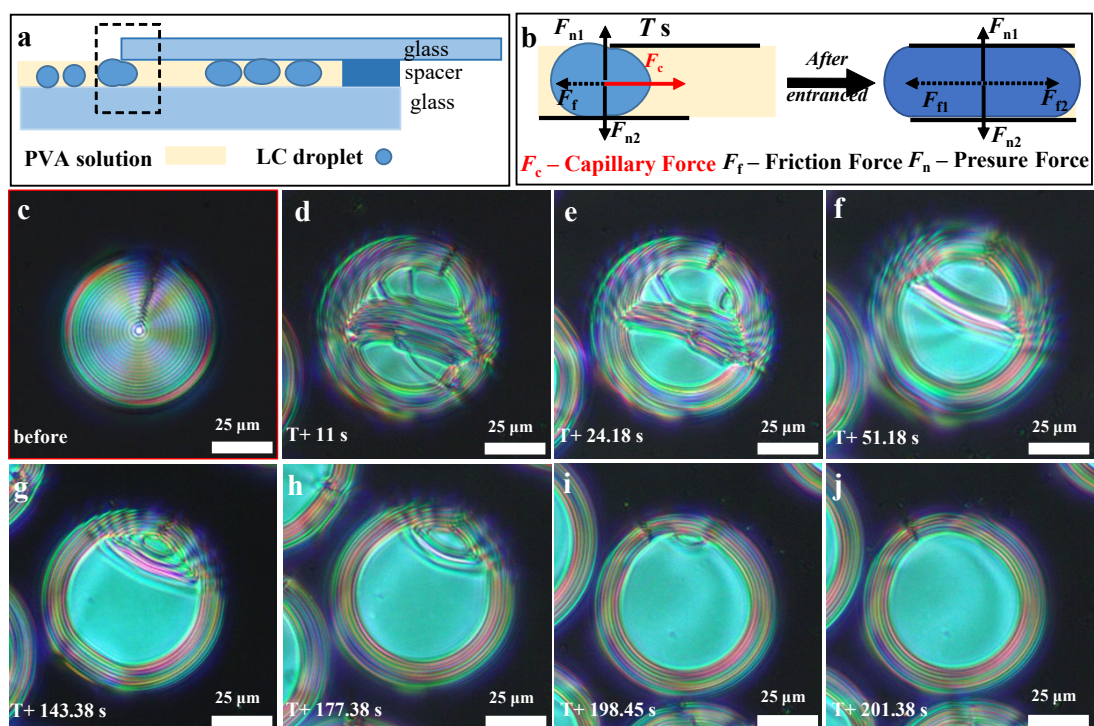

**Figure S3** The transformation progress of Ch-LC droplets ( $D= 54.8 \mu\text{m}$ ) entering a homemade device. **(a-b)** Schematic illustration of the progress (a) and the force diagram of a droplet (b). **(c-h)** POM images of a droplet at different period during the progress.

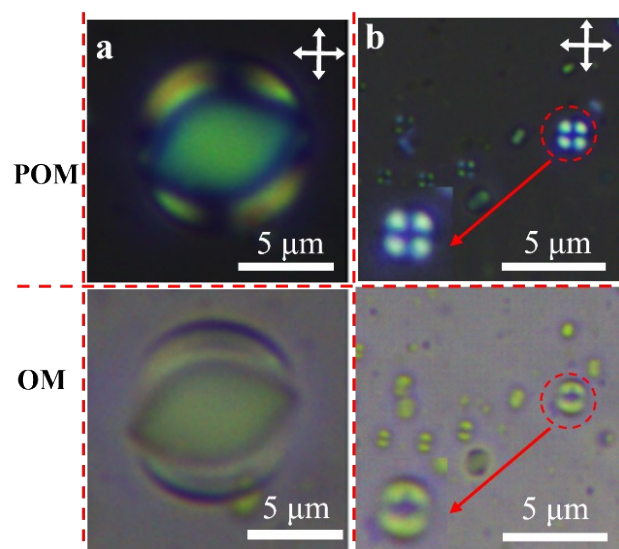

**Figure S4** POM and OM images of Ch-LC droplet with diameter of (a) 8 μm, (b) <5 μm.

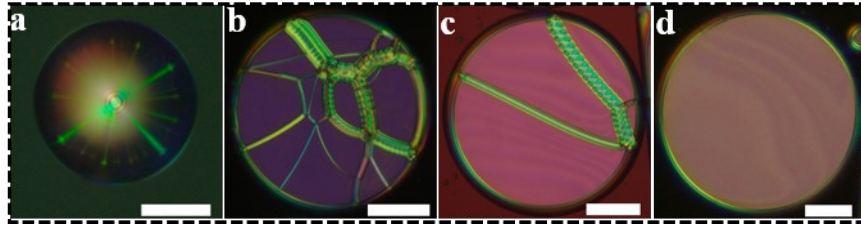

**Figure S5** Structure diversity of a high-chirality Ch-LC droplet ( $D = 33.3 \mu\text{m}$ ) with RSS structure under different strain ( $\varepsilon$ ) of (a) 0, (b) 1.4, (c) 3.6, (d) 7.8. Scale bars represent  $20 \mu\text{m}$ .

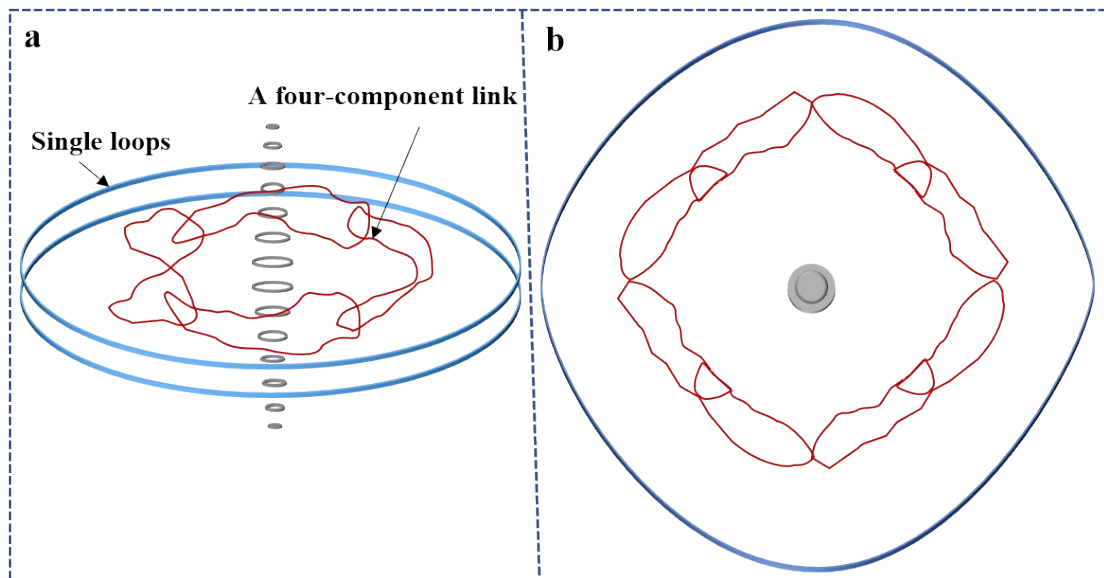

**Figure S6** Schematic illustration of lateral (a) and top (b) view of the knots of the RSS with inner pseudo-nematic structure. A series of single unlinked loops along the diametrical axis (gray); two unlinked single loops in the outer region (blue); and a four-component link consists of three connected Hopf links (red).

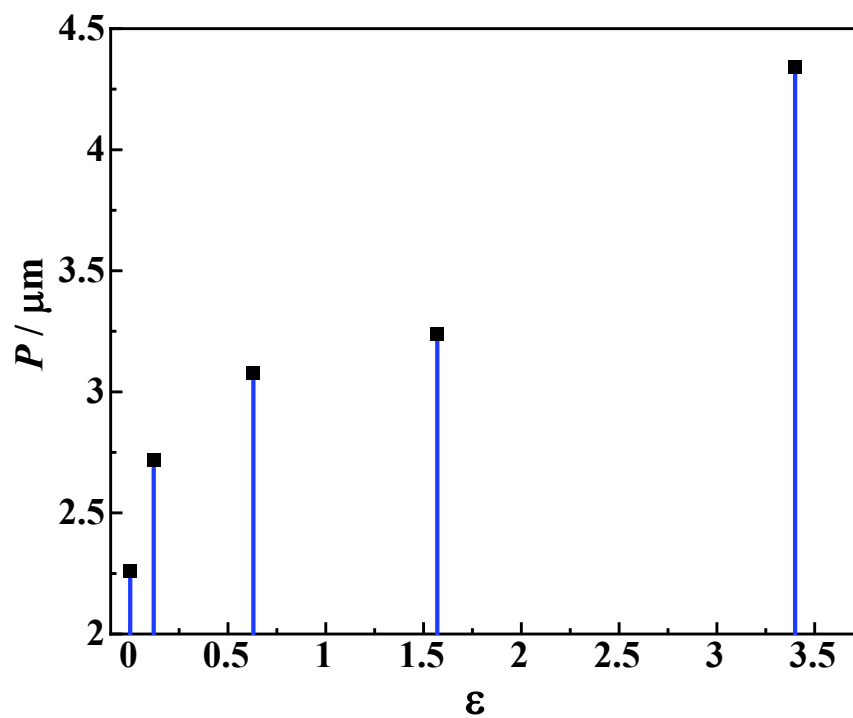

**Figure S7** The pitch value of the Ch-LC droplet ( $D = 54.8 \mu\text{m}$ ) under different strain ( $\epsilon$ ).



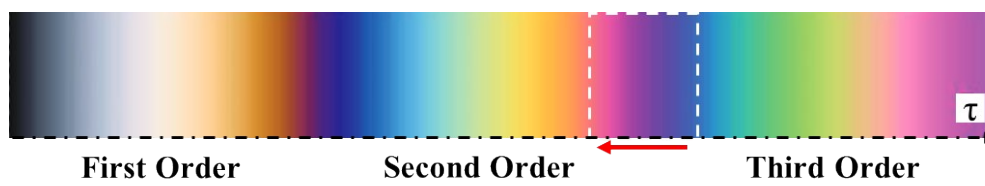

**Figure S8** Michel-Lévy birefringence chart, relating the light retardation. White dotted lines mark the approximate changed values of birefringence for images insets in **Figure 4a**.

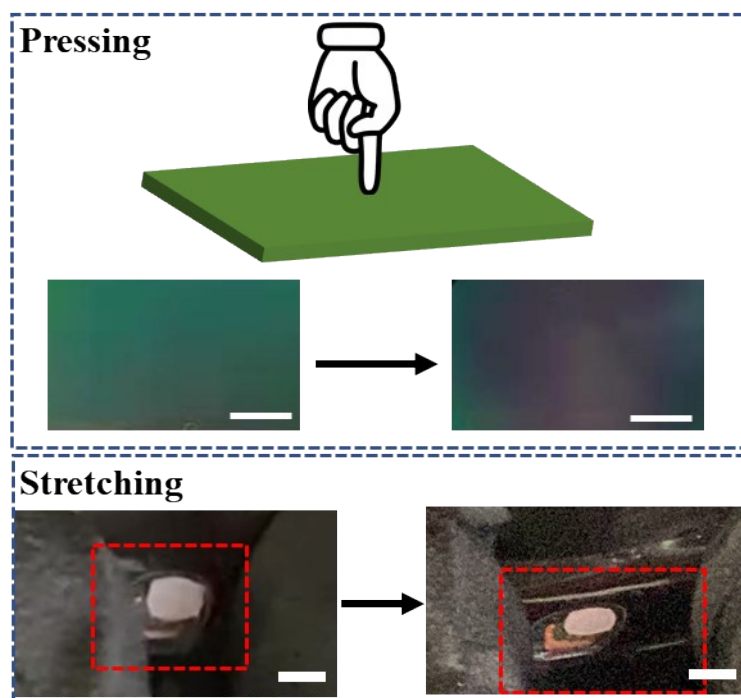

**Figure S9** Optical snaps of the flexible device under pressing and stretching. Scale bars represent 1 cm.

#### **Captions for Movie S1 to S2**

**Video S1.** Movie of a flexible device filled with Ch-LC droplet under pressing.

**Video S2.** Movie of a flexible device filled with Ch-LC droplet under stretching.
